# Supplementary material for: Qualitative Analyse von Patientenrückmeldungen zur prähospitalen Analgesie
Source: Springer Nature journal article supplement (doi:10.1007/s10049-023-01199-w), 2023-09-18
Supplement: MOESM1 [file 26057616]

**Zusatzmaterial zum Beitrag** „Qualitative Analyse von Patientenrückmeldungen zur prähospitalen Analgesie“ von Sander H, Häberle N, Gnirke A et al. (2021) in *Notfall+Rettenungsmedizin*.  
 Beitrag und Zusatzmaterial stehen Ihnen auf [www.springermedizin.de](http://www.springermedizin.de) zur Verfügung. Bitte geben Sie dort den Beitragstitel in die Suche ein.

## ZuFAR2 – Zufriedenheit Fragebogen Analgesie RKiSH gGmbH 2022

Ausfülldatum: \_\_\_\_ . \_\_\_\_ . 202\_\_ (bitte eintragen)

Medikament:  
(ggf. Codierung)

Wer füllt den Fragebogen aus?

| Betroffene Notfallperson selbst | Angehörige               | Betroffene und Angehörige zusammen | Sonstige Personen (bitte eintragen)<br>_____ |
|---------------------------------|--------------------------|------------------------------------|----------------------------------------------|
| <input type="checkbox"/>        | <input type="checkbox"/> | <input type="checkbox"/>           | <input type="checkbox"/>                     |

### A. Schmerzbehandlung

**A.1: Aufklärung zur Behandlung: Wie zufrieden waren Sie mit der Aufklärung vor der Schmerzbehandlung?**

| Sehr zufrieden           | Eher zufrieden           | Teils – teils            | Weniger zufrieden        | Nicht zufrieden          | Kann mich nicht erinnern |
|--------------------------|--------------------------|--------------------------|--------------------------|--------------------------|--------------------------|
| <input type="checkbox"/> |

**A.2: Fragen: Wurden Ihre Fragen zu Ihrer Schmerzbehandlung vom rettungsdienstlichen Fachpersonal verständlich beantwortet?**

| Ja, gut verständlich     | Weniger verständlich     | Unverständlich           | Ich hatte keine Fragen   |
|--------------------------|--------------------------|--------------------------|--------------------------|
| <input type="checkbox"/> | <input type="checkbox"/> | <input type="checkbox"/> | <input type="checkbox"/> |

**A.3: Schmerzbehandlung vor Ort: Wie zufrieden waren Sie mit den Abläufen der Schmerzbehandlung vor Ort (nach dem Eintreffen des Rettungswagens)?**

| Sehr zufrieden           | Eher zufrieden           | Teils – teils            | Weniger zufrieden        | Nicht zufrieden          |
|--------------------------|--------------------------|--------------------------|--------------------------|--------------------------|
| <input type="checkbox"/> |

**A.4: Schmerzreduktion nach Behandlung: Wie zufrieden waren Sie mit der Schmerzreduktion (Nachlassen des Schmerzes) bei Übergabe im Krankenhaus?**

| Sehr zufrieden           | Eher zufrieden           | Teils – teils            | Weniger zufrieden        | Nicht zufrieden          |
|--------------------------|--------------------------|--------------------------|--------------------------|--------------------------|
| <input type="checkbox"/> |

**A.5: War die angewendete Schmerzbehandlung aus Ihrer Sicht hilfreich?**

| Ja                       | Teils- teils             | Nein                     |
|--------------------------|--------------------------|--------------------------|
| <input type="checkbox"/> | <input type="checkbox"/> | <input type="checkbox"/> |

## B. Fachpersonal

### B.1: Betreuung: Wie würden Sie das rettungsdienstliche Fachpersonal beurteilen bezüglich...?

|                                                                                                      | Sehr gut                 | Gut                      | Weniger gut              | Schlecht                 |
|------------------------------------------------------------------------------------------------------|--------------------------|--------------------------|--------------------------|--------------------------|
| 1. ... Medizinische Kompetenz                                                                        | <input type="checkbox"/> | <input type="checkbox"/> | <input type="checkbox"/> | <input type="checkbox"/> |
| 2. ... Emotionale Kompetenz (z.B. Vertrauen aufbauen, beruhigen, Trost und Unterstützung vermitteln) | <input type="checkbox"/> | <input type="checkbox"/> | <input type="checkbox"/> | <input type="checkbox"/> |
| 3. ... Zuhören und Ernstnehmen                                                                       | <input type="checkbox"/> | <input type="checkbox"/> | <input type="checkbox"/> | <input type="checkbox"/> |
| 4. ... Soziale Kompetenz (z.B. Betreuung Angehöriger veranlassen, Angehörige unterstützen)           | <input type="checkbox"/> | <input type="checkbox"/> | <input type="checkbox"/> | <input type="checkbox"/> |
| 5. ... Höflichkeit                                                                                   | <input type="checkbox"/> | <input type="checkbox"/> | <input type="checkbox"/> | <input type="checkbox"/> |
| 6. ... Freundlichkeit                                                                                | <input type="checkbox"/> | <input type="checkbox"/> | <input type="checkbox"/> | <input type="checkbox"/> |
| 7. ... Zusammenarbeit/ Führung des Teams                                                             | <input type="checkbox"/> | <input type="checkbox"/> | <input type="checkbox"/> | <input type="checkbox"/> |

## C. Wartezeit

### C.1: Wartezeit: Wie lange hat es ab Eintreffen des Rettungswagens nach Ihrer Einschätzung gedauert, bis eine schmerzreduzierende Behandlung begonnen wurde?

| Weniger als 5 Minuten    | 5-10 Minuten             | 10-20 Minuten            | Über 20 Minuten          |
|--------------------------|--------------------------|--------------------------|--------------------------|
| <input type="checkbox"/> | <input type="checkbox"/> | <input type="checkbox"/> | <input type="checkbox"/> |

### C.2: Beurteilung der Wartezeit: Wie beurteilen Sie die Dauer der Wartezeit in der betreffenden Situation?

| Die Behandlung wurde schnell eingeleitet | Ich musste lange warten  | Kann ich nicht beurteilen |
|------------------------------------------|--------------------------|---------------------------|
| <input type="checkbox"/>                 | <input type="checkbox"/> | <input type="checkbox"/>  |

## D. Verträglichkeit der Medikation

### D.1: Verträglichkeit Medikamente: Wie wurden die verabreichten Schmerzmedikamente aus Ihrer Sicht vertragen?

| Gut                      | Teils- teils             | Schlecht                 |
|--------------------------|--------------------------|--------------------------|
| <input type="checkbox"/> | <input type="checkbox"/> | <input type="checkbox"/> |

### D.2: Nebenwirkungen und Komplikationen: Gab es Nebenwirkungen und/oder Komplikationen?

| Ja                       | Nein                     | Kann mich nicht erinnern |
|--------------------------|--------------------------|--------------------------|
| <input type="checkbox"/> | <input type="checkbox"/> | <input type="checkbox"/> |

## E. Bewertung insgesamt

**E.1: Zufrieden insgesamt: Waren Sie mit der Schmerzbehandlung insgesamt zufrieden?**

|                          |                          |                          |                          |                          |
|--------------------------|--------------------------|--------------------------|--------------------------|--------------------------|
| Sehr zufrieden           | Eher zufrieden           | Teils – teils            | Weniger zufrieden        | Nicht zufrieden          |
| <input type="checkbox"/> |

**E.2. Freitext: Möchten Sie uns noch etwas zur Schmerzbehandlung durch das Rettungsteam mitteilen?**

---

---

---

---

## F. Angaben zu Ihrer Person

**F.1: Welches Geschlecht haben Sie?**

|                                   |                                   |                                 |
|-----------------------------------|-----------------------------------|---------------------------------|
| <input type="checkbox"/> männlich | <input type="checkbox"/> weiblich | <input type="checkbox"/> divers |
|-----------------------------------|-----------------------------------|---------------------------------|

**F.2: Wann sind Sie geboren?**

Geburtsjahr: \_\_\_\_\_ (bitte eintragen)

**F.3: Wie würden Sie Ihren gegenwärtigen Gesundheitszustand beschreiben?**

|                          |                          |                          |                          |                          |
|--------------------------|--------------------------|--------------------------|--------------------------|--------------------------|
| Sehr gut                 | Gut                      | Zufrieden stellend       | Weniger gut              | Schlecht                 |
| <input type="checkbox"/> |

**Herzlichen Dank für Ihre Mitarbeit.**

**Bitte schicken Sie den ausgefüllten Fragebogen  
im beiliegenden Freiumschlag portofrei und anonym an:**

---

---

Quellen: Patientenzufriedenheit Notfallmedizin Innsbruck | Freiburger Index für Patientenzufriedenheit | ZUF-8-Fragebogen zur Patientenzufriedenheit | Evaluierter Fragebogen Anästhesie\*1
